# Supplementary material for: Deciphering the Molecular Mechanism of Intramolecular Reactions from the Perspective of Bonding Evolution Theory
Source: MDPI journal article supplement (doi:10.3390/physchem2030015), 2022-06-28
Supplement: s1 [file s1]

# **Deciphering the Molecular Mechanism of Intramolecular Reactions from the Perspective of Bonding Evolution Theory**

Abel Idrice Adjieufack <sup>a,b,c,\*</sup>, Juan Andrés <sup>d</sup>, Mónica Oliva <sup>d</sup> and Vicent S. Safont <sup>d\*</sup>

*<sup>a</sup>Laboratory of Theoretical Chemistry (LCT) and Namur Institute of Structured Matter (NISM), University of Namur, Rue de Bruxelles, 61, B-5000 Namur, Belgium.*

*<sup>b</sup>Physical and Theoretical Chemistry Laboratory, University of Yaoundé I, Cameroon.*

*<sup>c</sup>Computational Chemistry Laboratory, High Teacher Training College, University of Yaoundé I, Cameroon.*

*<sup>d</sup>Departament de Química Física i Analítica, Universitat Jaume I, Avda. Sos Baynat s/n 12071 Castelló, Spain.*

Email: adjieufack21@gmail.com  
safont@uji.es

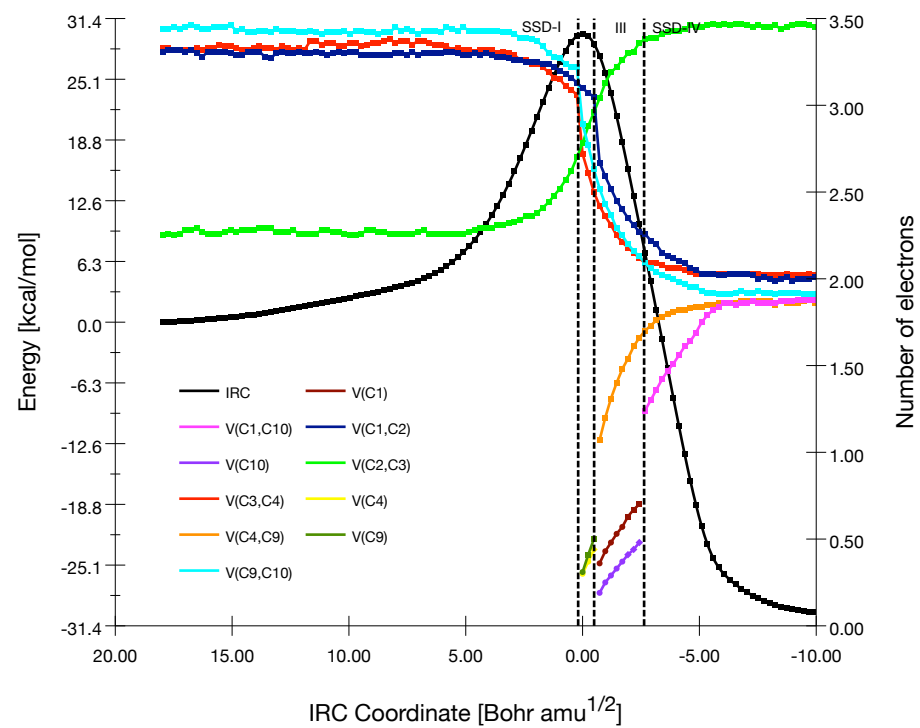

Figure S1. Population evolution (in e) of selected basins along the IRC associated with **TS2-b**.

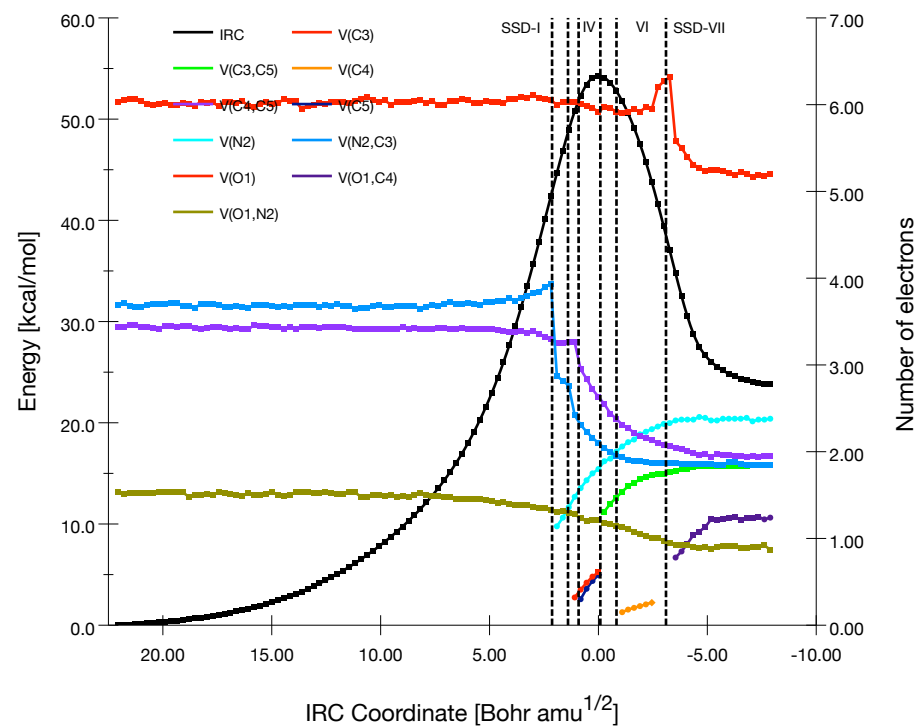

Figure S2. Population evolution (in e) of selected basins along the IRC associated with **TS3-b**.

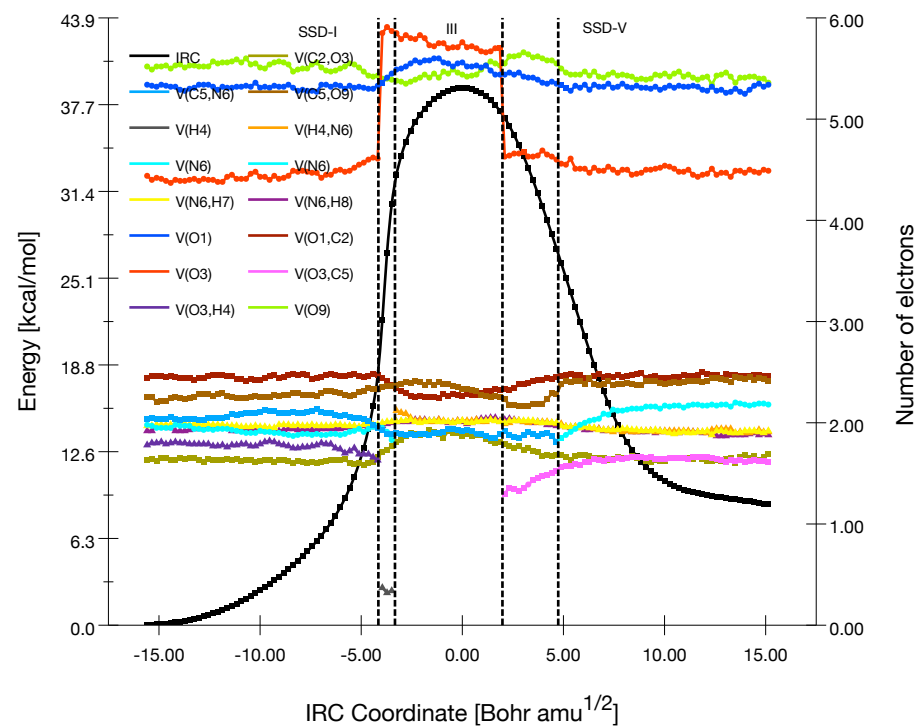

Figure S3. Population evolution (in e) of selected basins along the IRC associated with **TS4-b**.

Table S1: Basin Populations (in e), IRC coordinates (RX, amu<sup>1/2</sup>. Bohr) and C6-C11/O8-C9 chemical bonds (in Å) along the **TS1** reaction pathway.

| Basins       | SSDI-I   |       | SSD-II   |          | SSD-III   |           | SSD-IV   |          |
|--------------|----------|-------|----------|----------|-----------|-----------|----------|----------|
|              | reactant |       |          |          |           |           |          |          |
| V(O8)        | 4.97     | 5.36  | 5.87     | 5.53     | 5.53      | 5.41      | 5.38     | 5.22     |
| V(C6,C7)     | 3.52     | 3.29  | 3.29     | 3.22     | 2.80      | 2.66      | 2.55     | 2.12     |
| V(C7,O8)     | 1.42     | 1.59  | 1.63     | 1.77     | 1.85      | 1.94      | 2.01     | 2.38     |
| V(O8,C9)     | 1.24     | 0.54  | -        | -        | -         | -         | -        | -        |
| V(C9,C10)    | 2.07     | 2.30  | 2.39     | 2.65     | 2.98      | 3.08      | 3.14     | 3.42     |
| V(C10,C11)   | 3.44     | 3.28  | 3.26     | 3.14     | 2.62      | 2.51      | 2.41     | 2.05     |
| V(C6)        | -        | -     | -        | -        | 0.41      | 0.53      | -        | -        |
| V(C11)       | -        | -     | -        | -        | 0.28      | 0.35      | -        | -        |
| V(C6,C11)    | -        | -     | -        | -        | -         | -         | 1.05     | 1.83     |
| d(C6-C11)    | 3.721    | 2.210 | 2.167    | 2.079    | 2.035     | 1.987     | 1.939    | 1.546    |
| d(O8-C9)     | 1.427    | 1.661 | 1.711    | 1.809    | 1.857     | 1.904     | 1.949    | 3.482    |
| Catastrophes | -        | -     | <i>C</i> | <i>C</i> | <i>FF</i> | <i>FF</i> | <i>C</i> | <i>C</i> |
| Ea(kcal/mol) | 0.00     | 22.34 | 24.14    | 25.72    | 25.29     | 23.99     | 21.91    | -14.87   |
| Rx(amu.bohr) | -13.37   | -0.98 | -0.65    | 0.00     | 0.33      | 0.65      | 0.98     | 14.67    |

Table S2: Basin Populations (in e), IRC coordinates (RX, amu<sup>1/2</sup>. Bohr) and C1-C9/C4-C10 chemical bonds (in Å) along the **TS2-a** reaction pathway.

| Basins       | SSD-I    |       | SSD-II     |            | SSD-III  |          | SSD-IV   |          | SSD-V    |          |
|--------------|----------|-------|------------|------------|----------|----------|----------|----------|----------|----------|
|              | reactant |       |            |            |          |          |          |          |          |          |
| V(C1,C2)     | 3.30     | 3.01  | 2.68       | 2.68       | 2.57     | 2.34     | 2.29     | 2.15     | 2.12     | 1.99     |
| V(C2,C3)     | 2.28     | 2.81  | 2.90       | 2.90       | 2.98     | 3.19     | 3.24     | 3.35     | 3.37     | 3.47     |
| V(C3,C4)     | 3.33     | 3.06  | 3.02       | 3.02       | 2.69     | 2.45     | 2.39     | 2.24     | 2.20     | 2.03     |
| V(C9,C10)    | 3.42     | 3.19  | 2.78       | 2.78       | 2.64     | 2.36     | 2.29     | 2.10     | 2.07     | 1.92     |
| V(C1)        | -        | -     | 0.30       | 0.30       | 0.38     | 0.57     | -        | -        | -        | -        |
| V(C4)        | -        | -     | -          | -          | 0.34     | 0.49     | 0.54     | 0.68     | -        | -        |
| V(C9)        | -        | -     | 0.18       | 0.18       | 0.27     | 0.45     | -        | -        | -        | -        |
| V(C10)       | -        | -     | 0.26       | 0.26       | 0.34     | 0.54     | 0.51     | 0.68     | -        | -        |
| V(C1,C9)     | -        | -     | -          | -          | -        | -        | 1.20     | 1.48     | 1.52     | 1.84     |
| V(C4,C10)    | -        | -     | -          | -          | -        | -        | -        | -        | 1.42     | 1.87     |
| d(C1-C9)     | 3.653    | 2.123 | 2.085      | 2.085      | 2.047    | 1.935    | 1.898    | 1.760    | 1.728    | 1.541    |
| d(C4-C10)    | 3.115    | 2.358 | 2.327      | 2.327      | 2.296    | 2.201    | 2.201    | 2.168    | 1.989    | 1.579    |
| Catastrophes | -        | -     | <i>FFF</i> | <i>FFF</i> | <i>F</i> | <i>F</i> | <i>C</i> | <i>C</i> | <i>C</i> | <i>C</i> |
| Ea(kcal/mol) | 0.00     | 27.56 | 27.33      | 27.33      | 26.57    | 20.91    | 18.00    | 3.60     | -0.24    | -9.25    |
| Rx(amu.bohr) | 10.96    | 0.00  | -0.24      | -0.24      | -0.48    | -1.22    | -1.46    | -2.44    | -2.68    | -28.84   |

Table S3: Basin Populations (in e), IRC coordinates (RX, amu<sup>1/2</sup>. Bohr) and C1-C10/C4-C9 chemical bonds (in Å) along the **TS2-b** reaction pathway.

| Basins       | SSD-I    |       | SSD-II    |           | SSD-III    |            | SSD-IV   |          |
|--------------|----------|-------|-----------|-----------|------------|------------|----------|----------|
|              | reactant |       |           |           |            |            |          |          |
| V(C1,C2)     | 3.31     | 3.13  | 3.10      | 3.05      | 2.67       | 2.27       | 2.26     | 2.01     |
| V(C2,C3)     | 2.25     | 2.70  | 2.78      | 2.96      | 3.04       | 3.36       | 3.38     | 3.45     |
| V(C3,C4)     | 3.33     | 3.06  | 2.72      | 2.50      | 2.42       | 2.12       | 2.09     | 2.02     |
| V(C9,C10)    | 3.44     | 3.22  | 2.89      | 2.63      | 2.52       | 2.13       | 2.09     | 1.91     |
| V(C1)        | -        | -     | -         | -         | 0.36       | 0.70       | -        | -        |
| V(C4)        | -        | -     | 0.30      | 0.44      | -          | -          | -        | -        |
| V(C9)        | -        | -     | 0.31      | 0.50      | -          | -          | -        | -        |
| V(C10)       | -        | -     | -         | -         | 0.19       | 0.48       | -        | -        |
| V(C1,C10)    | -        | -     | -         | -         | -          | -          | 1.24     | 1.88     |
| V(C4,C9)     | -        | -     | -         | -         | 1.07       | 1.66       | 1.70     | 1.86     |
| d(C1-C10)    | 3.741    | 2.541 | 2.516     | 2.465     | 2.439      | 2.208      | 2.166    | 1.567    |
| d(C4-C9)     | 3.617    | 2.052 | 2.009     | 1.926     | 1.885      | 1.645      | 1.623    | 1.538    |
| Catastrophes | -        | -     | <i>FF</i> | <i>FF</i> | <i>FFC</i> | <i>FFC</i> | <i>C</i> | <i>C</i> |
| Ea(kcal/mol) | 0.00     | 29.56 | 29.78     | 28.78     | 27.52      | 10.10      | 7.18     | -29.94   |
| Rx(amu.bohr) | 17.97    | 0.24  | 0.00      | -0.48     | -0.73      | -2.43      | -2.67    | -9.95    |

Table S4: Basin Populations (in e), IRC coordinates (RX, amu<sup>1/2</sup>. Bohr) and C3-C4/O1-C5 chemical bonds (in Å) along the **TS3-a** reaction pathway.

| Basins       | SSD-I    |       | SSD-II   |          | SSD-III   |           | SSD-IV   |          | SSD-V    |          |
|--------------|----------|-------|----------|----------|-----------|-----------|----------|----------|----------|----------|
|              | reactant |       |          |          |           |           |          |          |          |          |
| V(O1)        | 5.96     | 5.94  | 5.93     | 5.93     | 5.95      | 6.10      | 5.39     | 5.39     | 5.37     | 5.04     |
| V(O1,N2)     | 1.52     | 1.36  | 1.32     | 1.32     | 1.27      | 1.13      | 1.10     | 1.10     | 1.09     | 0.98     |
| V(N2,C3)     | 3.68     | 3.97  | 2.94     | 2.94     | 2.55      | 2.15      | 2.10     | 2.10     | 2.06     | 1.80     |
| V(C4,C5)     | 3.43     | 3.32  | 3.31     | 3.31     | 2.94      | 2.30      | 2.22     | 2.22     | 2.16     | 1.95     |
| V(N2)        |          |       | 1.12     | 1.12     | 1.29      | 1.88      | 1.95     | 1.95     | 2.02     | 2.36     |
| V(C3)        | -        | -     | -        | -        | 0.35      | 0.78      | 0.81     | 0.81     | -        | -        |
| V(C4)        | -        | -     | -        | -        | 0.32      | 0.61      | 0.65     | 0.65     | -        | -        |
| V(C3,C4)     | -        | -     | -        | -        | -         | -         | -        | -        | 1.54     | 1.92     |
| V(O1,C5)     | -        | -     | -        | -        | -         | -         | 0.72     | 0.72     | 0.81     | 1.30     |
| d(C3-C4)     | 2.977    | 2.308 | 2.265    | 2.265    | 2.220     | 1.988     | 1.941    | 1.941    | 1.893    | 1.558    |
| d(O1-C5)     | 3.057    | 2.073 | 2.024    | 2.024    | 1.976     | 1.744     | 1.698    | 1.698    | 1.653    | 1.420    |
| Catastrophes | -        | -     | <i>F</i> | <i>F</i> | <i>FF</i> | <i>FF</i> | <i>C</i> | <i>C</i> | <i>C</i> | <i>C</i> |
| Ea(kcal/mol) | 0.00     | 13.85 | 14.48    | 14.48    | 14.72     | 5.96      | 2.06     | 2.06     | -2.26    | -31.20   |
| Rx(amu.bohr) | -8.84    | -0.66 | -0.33    | -0.33    | 0.00      | 1.64      | 1.96     | 1.96     | 2.30     | 13.09    |



Table S5: Basin Populations (in e), IRC coordinates (RX, amu<sup>1/2</sup>. Bohr) and C3-C5/O1-C4 chemical bonds (in Å) along the **TS3-b** reaction pathway.

| Basins       | SSD-I    |       | SSD-II   |          | SSD-III  |          | SSD-IV   |          | SSD-V    |          | SSD-VI   |          | SSD-VII  |          |
|--------------|----------|-------|----------|----------|----------|----------|----------|----------|----------|----------|----------|----------|----------|----------|
|              | reactant |       |          |          |          |          |          |          |          |          |          |          |          |          |
| V(O1)        | 6.04     | 6.05  | 6.00     | 6.03     | 6.03     | 6.03     | 6.01     | 5.92     | 5.97     | 5.92     | 5.90     | 5.97     | 5.58     | 5.20     |
| V(O1,N2)     | 1.54     | 1.33  | 1.31     | 1.29     | 1.28     | 1.28     | 1.23     | 1.21     | 1.18     | 1.14     | 1.13     | 1.01     | 0.93     | 0.87     |
| V(N2,C3)     | 3.69     | 3.93  | 2.87     | 2.76     | 2.42     | 2.42     | 2.31     | 2.10     | 2.04     | 1.95     | 1.94     | 1.87     | 1.87     | 1.85     |
| V(C4,C5)     | 3.44     | 3.30  | 3.25     | 3.26     | 3.26     | 3.26     | 2.95     | 2.63     | 2.55     | 2.38     | 2.31     | 2.13     | 2.04     | 1.95     |
| V(N2)        |          |       | 1.14     | 1.36     | 1.48     | 1.48     | 1.58     | 1.80     | 1.89     | 2.00     | 2.06     | 2.26     | 2.36     | 2.38     |
| V(C3)        | -        | -     | -        | -        | 0.32     | 0.32     | 0.41     | 0.61     | -        | -        | -        | -        | -        | -        |
| V(C4)        | -        | -     | -        | -        | -        | -        | -        | -        | -        | -        | 0.15     | 0.26     | -        | -        |
| V(C5)        | -        | -     | -        | -        | -        | -        | 0.30     | 0.58     | -        | -        | -        | -        | -        | -        |
| V(C3,C5)     | -        | -     | -        | -        | -        | -        | -        | -        | 1.31     | 1.47     | 1.54     | 1.73     | 1.78     | 1.85     |
| V(O1,C4)     | -        | -     | -        | -        | -        | -        | -        | -        | -        | -        | -        | -        | 0.78     | 1.24     |
| d(C3-C5)     | 3.810    | 2.194 | 2.146    | 2.049    | 2.001    | 2.001    | 1.953    | 1.817    | 1.775    | 1.705    | 1.677    | 1.598    | 1.570    | 1.542    |
| d(O1-C4)     | 3.704    | 2.502 | 2.477    | 2.428    | 2.404    | 2.404    | 2.378    | 2.294    | 2.263    | 2.187    | 2.144    | 1.905    | 1.707    | 1.465    |
| Catastrophes | -        | -     | <i>F</i> | <i>F</i> | <i>F</i> | <i>F</i> | <i>F</i> | <i>F</i> | <i>C</i> | <i>C</i> | <i>F</i> | <i>F</i> | <i>C</i> | <i>C</i> |
| Ea(kcal/mol) | 0.00     | 42.41 | 44.67    | 48.93    | 50.77    | 50.77    | 52.30    | 54.29    | 54.10    | 52.79    | 51.78    | 43.78    | 34.75    | 23.79    |
| Rx(amu.bohr) | 22.07    | 2.18  | 1.91     | 1.36     | 1.09     | 1.09     | 0.82     | 0.00     | -0.27    | -0.82    | -1.90    | -2.45    | -3.54    | -7.89    |

Table S6: Basin Populations (in e), IRC coordinates (RX, amu<sup>1/2</sup>. Bohr) and C2-N6/O3-H8 chemical bonds (in Å) along the **TS4-a** reaction pathway.

| Basins       | SSDI-I   |       | SSD-II   |          | SSD-III  |          | SSD-IV    |           | SSD-V    |          |
|--------------|----------|-------|----------|----------|----------|----------|-----------|-----------|----------|----------|
|              | reactant |       |          |          |          |          |           |           |          |          |
| V(O1)        | 5.38     | 5.59  | 5.62     | 5.68     | 5.67     | 5.65     | 5.66      | 5.62      | 5.56     | 5.47     |
| V(O9)        | 5.47     | 5.45  | 5.43     | 5.47     | 5.47     | 5.49     | 5.50      | 5.50      | 5.51     | 5.50     |
| V(O1,C2)     | 2.39     | 2.19  | 2.16     | 2.10     | 2.12     | 2.12     | 2.12      | 2.19      | 2.20     | 2.29     |
| V(C2,O3)     | 1.58     | 1.47  | 1.45     | 1.07     | -        | -        | -         | -         | -        | -        |
| V(O3)        | 4.49     | 4.66  | 4.70     | 5.04     | 6.09     | 6.00     | 5.98      | 5.79      | 4.30     | 4.55     |
| V(O3,H4)     | 1.75     | 1.72  | 1.71     | 1.71     | 1.72     | 1.73     | 1.73      | 1.78      | 1.79     | 1.67     |
| V(C2,N6)     | -        | -     | 1.94     | 1.86     | 1.84     | 1.82     | 1.80      | 1.78      | 1.80     | 1.87     |
| V(C5,N6)     | 1.98     | 1.97  | 1.95     | 2.01     | 2.01     | 2.03     | 2.02      | 2.05      | 2.06     | 2.02     |
| V(C5,O9)     | 2.32     | 2.34  | 2.36     | 2.38     | 2.37     | 2.37     | 2.36      | 2.32      | 2.32     | 2.33     |
| V(N6)        | 2.01     | 1.88  | -        | -        | -        | -        | 1.85      | 2.01      | 2.02     | 1.99     |
| V(N6,H7)     | 1.97     | 2.01  | 2.00     | 2.03     | 2.02     | 2.04     | 2.04      | 2.01      | 2.00     | 2.00     |
| V(N6,H8)     | 1.93     | 1.98  | 1.98     | 2.08     | 2.11     | 2.17     | -         | -         | -        | -        |
| V(H8)        | -        | -     | -        | -        |          |          | 0.36      | 0.39      | -        | -        |
| V(O3,H8)     | -        | -     | -        | -        | -        | -        |           |           | 1.86     | 1.68     |
| d(C2-N6)     | 2.258    | 1.902 | 1.886    | 1.653    | 1.647    | 1.633    | 1.629     | 1.611     | 1.606    | 1.369    |
| d(O3-H8)     | 2.311    | 2.207 | 2.192    | 1.588    | 1.545    | 1.401    | 1.163     | 1.101     | 1.061    | 0.963    |
| Catastrophes | -        | -     | <i>C</i> | <i>C</i> | <i>C</i> | <i>C</i> | <i>FF</i> | <i>FF</i> | <i>C</i> | <i>C</i> |
| Ea(kcal/mol) | 0.00     | 11.47 | 12.00    | 30.48    | 31.60    | 34.51    | 35.10     | 31.14     | 29.33    | -16.84   |
| Rx(amu.bohr) | -5.72    | -3.30 | -3.19    | -0.66    | -0.55    | -0.22    | -0.11     | 0.44      | 0.55     | 10.99    |

Table S7: Basin Populations (in e), IRC coordinates (RX, amu<sup>1/2</sup>. Bohr) and O3-C5/N6-H4 chemical bonds (in Å) along the **TS4-b** reaction pathway.

| Basins       | SSD-I    |       | SSD-II    |           | SSD-III    |            | SSD-IV   |          | SSD-V     |           |
|--------------|----------|-------|-----------|-----------|------------|------------|----------|----------|-----------|-----------|
|              | reactant |       |           |           |            |            |          |          |           |           |
| V(O1)        | 5.34     | 5.33  | 5.36      | 5.45      | 5.49       | 5.44       | 5.44     | 5.35     | 5.34      | 5.29      |
| V(O9)        | 5.52     | 5.43  | 5.40      | 5.39      | 5.38       | 5.53       | 5.55     | 5.55     | 5.50      | 5.42      |
| V(O1,C2)     | 2.44     | 2.47  | 2.44      | 2.37      | 2.34       | 2.32       | 2.33     | 2.45     | 2.46      | 2.46      |
| V(C2,O3)     | 1.63     | 1.66  | 1.71      | 1.77      | 1.81       | 1.81       | 1.79     | 1.68     | 1.68      | 1.65      |
| V(O3)        | 4.44     | 4.61  | 5.85      | 5.87      | 5.85       | 5.70       | 4.63     | 4.60     | 4.56      | 4.50      |
| V(O3,H4)     | 1.78     | 1.63  | -         | -         | -          | -          | -        | -        | -         | -         |
| V(C5,N6)     | 2.04     | 1.95  | 1.93      | 1.89      | 1.90       | 1.89       | 1.92     | 1.81     | -         | -         |
| V(C5,O9)     | 2.25     | 2.33  | 2.35      | 2.36      | 2.37       | 2.25       | 2.23     | 2.28     | 2.38      | 2.45      |
| V(N6)        | 1.98     | 1.97  | 1.95      | 1.83      | -          | -          | -        | -        | 1.85      | 2.17      |
| V(N6,H7)     | 1.92     | 1.96  | 1.97      | 2.00      | 2.01       | 2.02       | 2.03     | 1.97     | 1.97      | 1.89      |
| V(N6,H8)     | 1.97     | 1.98  | 2.00      | 2.01      | 2.01       | 2.01       | 2.00     | 2.00     | 1.97      | 1.92      |
| V(H4)        | -        | -     | 0.37      | 0.34      | -          | -          | -        | -        | -         | -         |
| V(O3,C5)     | -        | -     | -         | -         | -          | -          | 1.30     | 1.52     | 1.56      | 1.62      |
| V(H4,N6)     | -        | -     | -         | -         | 2.12       | 2.01       | 1.99     | 1.99     | 1.99      | 1.90      |
| d(O3-C5)     | 3.158    | 2.452 | 2.442     | 2.431     | 2.422      | 1.799      | 1.766    | 1.475    | 1.462     | 1.384     |
| d(H4,N6)     | 1.938    | 1.482 | 1.388     | 1.202     | 1.135      | 1.017      | 1.017    | 1.013    | 1.013     | 1.012     |
| Catastrophes |          |       | <i>CF</i> | <i>CF</i> | <i>CFF</i> | <i>FFC</i> | <i>C</i> | <i>C</i> | <i>CF</i> | <i>CF</i> |
| Ea(kcal/mol) | 0.00     | 18.07 | 22.05     | 30.45     | 32.56      | 37.18      | 36.68    | 27.25    | 26.19     | 8.95      |
| Rx(amu.bohr) | -15.58   | -4.18 | -3.96     | -3.49     | -3.26      | 1.86       | 2.09     | 4.66     | 4.90      | 12.20     |

Table S8: Relative electronic energies ( $\Delta E$ , kcal/mol), enthalpies ( $\Delta H$ , kcal/mol), entropies ( $\Delta S$ , cal/mol.K) and Gibbs free energies ( $\Delta G$ , kcal/mol) of activation and reaction for the thermal sigmatropic rearrangement of allyloxycycloheptatriene

| Species      | $\Delta E$ | $\Delta H$ | $\Delta S$ | $\Delta G$ |
|--------------|------------|------------|------------|------------|
| <b>TS1</b>   | 27.0       | 25.4       | 30.0       | -9.6       |
| <b>2</b>     | -16.7      | -16.3      | -14.8      | -3.2       |
| <b>TS2-a</b> | 12.5       | 11.4       | 18.1       | -14.1      |
| <b>TS2-b</b> | 14.6       | 13.5       | 19.8       | -13.3      |
| <b>3</b>     | -43.9      | -42.5      | -33.7      | -18.4      |
| <b>4</b>     | -45.1      | -43.8      | -35.0      | -18.7      |

Table S9. Electronic energies, enthalpies, entropies and Gibbs free energies (in a.u) of all species involved in the thermal sigmatropic rearrangement of allyloxycycloheptatriene

| Species      | E          | H           | S       | G          |
|--------------|------------|-------------|---------|------------|
| <b>1</b>     | -463.38583 | -463.164531 | 125.870 | -463.25944 |
| <b>TS1</b>   | -463.34283 | -463.124011 | 116.249 | -463.21167 |
| <b>2</b>     | -463.41242 | -463.190459 | 122.705 | -463.28298 |
| <b>TS2-a</b> | -463.36592 | -463.146305 | 111.785 | -463.23059 |
| <b>TS2-b</b> | -463.36257 | -463.143001 | 112.565 | -463.22788 |
| <b>3</b>     | -463.45582 | -463.232205 | 107.443 | -463.31322 |
| <b>4</b>     | -463.45775 | -463.234391 | 107.186 | -463.31521 |

Table S10. Relative electronic energies ( $\Delta E$ , kcal/mol), enthalpies ( $\Delta H^\circ$ , kcal/mol), entropies ( $\Delta S^\circ$ , cal/mol.K) and Gibbs free energies ( $\Delta G^\circ$ , kcal/mol) of activation and reaction for the IM32CA of nitron-alkene 5

| Species      | $\Delta E^\circ(\text{gas})$ | $\Delta E^\circ(\text{Toluene})$ | $\Delta H^\circ(\text{Toluene})$ | $\Delta S^\circ(\text{Toluene})$ | $\Delta G^\circ(\text{Toluene})$ |
|--------------|------------------------------|----------------------------------|----------------------------------|----------------------------------|----------------------------------|
| <b>TS3-a</b> | 15.9                         | 17.8                             | 17.3                             | -13.8                            | 21.4                             |
| <b>TS3-b</b> | 53.4                         | 54.3                             | 53.6                             | -15.4                            | 58.2                             |
| <b>6</b>     | -28.5                        | -26.9                            | -25.3                            | -13.9                            | -21.1                            |
| <b>7</b>     | -26.8                        | -25.4                            | -23.9                            | -16.8                            | -18.9                            |

**Table S11** Electronic energies, enthalpies, entropies and Gibbs free energies (in a.u) of all species involved in the IM32CA of nitron-alkene 5

| Species      | E(gas)     | E(Toluene) | H(Toluene) | S(Toluene) | G(Toluene) |
|--------------|------------|------------|------------|------------|------------|
| <b>5</b>     | -955.02011 | -955.02662 | -954.79235 | 121.165    | -954.84992 |
| <b>TS3-a</b> | -954.99479 | -954.99827 | -954.76484 | 107.382    | -954.81586 |
| <b>TS3-b</b> | -954.93503 | -954.94004 | -954.70686 | 105.801    | -954.75713 |
| <b>6</b>     | -955.06554 | -955.06945 | -954.83260 | 107.222    | -954.88354 |
| <b>7</b>     | -955.06284 | -955.06716 | -954.83040 | 104.389    | -954.88000 |

Table S12 Relative electronic energies ( $\Delta E$ , kcal/mol), enthalpies ( $\Delta H$ , kcal/mol), entropies ( $\Delta S$ , cal/mol.K) and Gibbs free energies ( $\Delta G$ , kcal/mol) of activation and reaction for the Thermal decomposition of N-carbamoyl-L-proline

| Species                   | $\Delta E$ | $\Delta H$ | $\Delta S$ | $\Delta G$ |
|---------------------------|------------|------------|------------|------------|
| <b>TS4-a</b>              | 54.1       | 49.9       | -6.0       | 52.7       |
| <b>TS4-b</b>              | 40.3       | 38.9       | -6.0       | 41.8       |
| <b>9(H<sub>2</sub>O)</b>  | 16.0       | 13.3       | 34.4       | -3.1       |
| <b>10(NH<sub>3</sub>)</b> | 8.0        | 5.3        | 32.4       | -10.1      |

Table S13. Electronic energies, enthalpies, entropies and Gibbs free energies (in a.u.) of all species involved in the Thermal decomposition of N-carbamoyl-L-proline

| Species                   | E          | H          | S       | G          |
|---------------------------|------------|------------|---------|------------|
| <b>8</b>                  | -569.87326 | -569.67368 | 123.392 | -569.76731 |
| <b>TS4-a</b>              | -569.78699 | -569.59417 | 117.423 | -569.68327 |
| <b>TS4-b</b>              | -569.80910 | -569.61167 | 117.420 | -569.70077 |
| <b>9(H<sub>2</sub>O)</b>  | -569.84777 | -569.65254 | 157.834 | -569.77230 |
| <b>10(NH<sub>3</sub>)</b> | -569.86051 | -569.66527 | 155.755 | -569.78346 |

#### Cartesian coordinates

##### 1

|   |               |               |               |
|---|---------------|---------------|---------------|
| C | -2.5952950000 | 1.1101830000  | -0.6294860000 |
| C | -2.9634680000 | -0.1695560000 | -0.7510130000 |
| C | -1.6539420000 | 1.6028480000  | 0.3570950000  |
| C | -1.0356400000 | -1.3933760000 | 0.1144870000  |
| C | -0.5845580000 | 0.9310830000  | 0.8295770000  |
| C | -0.1878130000 | -0.4132780000 | 0.4465200000  |
| H | -3.0086480000 | 1.8440850000  | -1.3115450000 |
| H | -3.6077510000 | -0.4663620000 | -1.5698070000 |
| H | -1.7655030000 | 2.6373270000  | 0.6612900000  |
| H | -0.6246470000 | -2.3377740000 | -0.2184550000 |
| H | 0.1091420000  | 1.4516660000  | 1.4808410000  |
| O | 1.1628510000  | -0.6790070000 | 0.4813140000  |
| C | 1.9382090000  | 0.0991890000  | -0.4242820000 |
| C | 3.3572900000  | -0.3544860000 | -0.3337340000 |
| H | 1.5506290000  | -0.0550680000 | -1.4385170000 |
| H | 3.5114010000  | -1.4242680000 | -0.4224790000 |
| C | 4.3833500000  | 0.4641020000  | -0.1743750000 |
| H | 5.4005560000  | 0.0988670000  | -0.1443120000 |
| H | 4.2391060000  | 1.5330130000  | -0.0716280000 |
| H | 1.8595040000  | 1.1649070000  | -0.1908230000 |
| C | -2.5193210000 | -1.2099760000 | 0.2401890000  |
| H | -2.7617160000 | -0.8639970000 | 1.2501380000  |
| H | -3.0377580000 | -2.1507440000 | 0.0749130000  |

##### TS1

|   |              |               |              |
|---|--------------|---------------|--------------|
| C | 0.6496530000 | -1.3903110000 | 0.4438390000 |
| C | 1.9887270000 | -1.2827080000 | 0.5586270000 |

|   |               |               |               |
|---|---------------|---------------|---------------|
| C | 2.8190270000  | -0.2866780000 | -0.0933110000 |
| C | -0.2036910000 | -0.5668610000 | -0.4088650000 |
| C | 2.4351560000  | 0.9675600000  | -0.3514160000 |
| C | -0.0402070000 | 0.8199820000  | -0.5166610000 |
| C | 1.1285380000  | 1.5052020000  | 0.1494310000  |
| H | 0.1614120000  | -2.2657680000 | 0.8592400000  |
| H | 2.5086500000  | -2.0722910000 | 1.0890930000  |
| H | 3.8103940000  | -0.6059920000 | -0.3926850000 |
| H | 3.0921590000  | 1.6240620000  | -0.9084590000 |
| H | -0.4828450000 | 1.2916370000  | -1.3830610000 |
| H | 1.0728670000  | 1.3193990000  | 1.2277730000  |
| H | 1.0645250000  | 2.5808450000  | -0.0026880000 |
| O | -1.2492670000 | -1.1298300000 | -0.9148460000 |
| C | -2.6859790000 | -0.7680150000 | 0.1238720000  |
| H | -3.4337610000 | -1.3107070000 | -0.4361230000 |
| H | -2.3274740000 | -1.2862370000 | 1.0053060000  |
| C | -2.6998470000 | 0.6286410000  | 0.1292590000  |
| H | -3.2641130000 | 1.1433400000  | -0.6379370000 |
| C | -1.6380360000 | 1.2771270000  | 0.7338320000  |
| H | -1.1828360000 | 0.8421670000  | 1.6162490000  |
| H | -1.5448890000 | 2.3545510000  | 0.6704150000  |

## 2

|   |               |               |               |
|---|---------------|---------------|---------------|
| C | 2.4259930000  | -0.3674800000 | -0.6685810000 |
| C | 2.0722760000  | -1.1637030000 | 0.3421610000  |
| C | 1.8612090000  | 0.9298410000  | -1.0235790000 |
| C | -0.3450060000 | -0.3829140000 | 0.7591000000  |
| C | 0.7655880000  | 1.5565140000  | -0.5746810000 |
| C | -0.2271510000 | 1.0934220000  | 0.4233460000  |
| H | 3.2622340000  | -0.6812000000 | -1.2811460000 |
| H | 2.6499340000  | -2.0700800000 | 0.4820790000  |
| H | 2.4491450000  | 1.4783530000  | -1.7516260000 |
| H | -1.0918950000 | -0.4335740000 | 1.5518600000  |
| H | 0.5560050000  | 2.5565960000  | -0.9328770000 |
| O | -0.9423800000 | 1.9115340000  | 0.9579610000  |
| C | -3.1216290000 | -0.1529360000 | -0.3272490000 |
| C | -2.2395090000 | -0.9746830000 | -0.8760960000 |
| H | -4.1200470000 | -0.0715300000 | -0.7351500000 |
| H | -2.5418320000 | -1.5583530000 | -1.7403150000 |
| C | -0.8255330000 | -1.2138770000 | -0.4327240000 |
| H | -0.7192090000 | -2.2732540000 | -0.1746560000 |
| H | -0.1587550000 | -1.0585870000 | -1.2845030000 |
| H | -2.8875570000 | 0.4723360000  | 0.5239040000  |
| C | 0.9743340000  | -0.9192530000 | 1.3328130000  |
| H | 0.7568260000  | -1.8542600000 | 1.8503730000  |
| H | 1.3407690000  | -0.2283050000 | 2.1013060000  |

## TS2-a

|   |               |               |              |
|---|---------------|---------------|--------------|
| C | -2.0638610000 | -0.4991160000 | 0.4025220000 |
| C | -1.5916630000 | 0.7955950000  | 0.4843550000 |

|   |               |               |               |
|---|---------------|---------------|---------------|
| C | -1.2225110000 | -1.5934900000 | 0.2878300000  |
| C | 0.9330590000  | 0.9117150000  | 0.6538450000  |
| C | 0.1377020000  | -1.5146190000 | -0.0206330000 |
| C | 1.1993420000  | -0.5750480000 | 0.4740860000  |
| H | -3.1230560000 | -0.6593420000 | 0.2385310000  |
| H | -2.3225110000 | 1.5839650000  | 0.3423540000  |
| H | -1.6775330000 | -2.5676070000 | 0.1571020000  |
| H | 1.7686920000  | 1.3036450000  | 1.2314810000  |
| H | 0.6153150000  | -2.4568210000 | -0.2686210000 |
| O | 2.3150180000  | -1.0123010000 | 0.6409960000  |
| C | 0.0071020000  | -0.4361410000 | -1.8440580000 |
| C | -0.2589570000 | 0.8650610000  | -1.4602440000 |
| H | -0.7336260000 | -1.0083470000 | -2.3861060000 |
| H | -1.1055980000 | 1.4000370000  | -1.8610500000 |
| C | 0.8435930000  | 1.5788450000  | -0.7340720000 |
| H | 1.7935940000  | 1.4803700000  | -1.2625290000 |
| H | 0.6362750000  | 2.6406980000  | -0.6021590000 |
| H | 1.0342650000  | -0.7303740000 | -2.0270050000 |
| C | -0.3991860000 | 1.1755820000  | 1.3331560000  |
| H | -0.4549440000 | 2.2373370000  | 1.5742950000  |
| H | -0.4587410000 | 0.6245410000  | 2.2750120000  |

### TS2-b

|   |               |               |               |
|---|---------------|---------------|---------------|
| C | 1.5640860000  | 1.3711290000  | 0.4193420000  |
| C | 1.5708510000  | 0.0497000000  | 0.8676960000  |
| C | 0.5528470000  | 1.8949620000  | -0.3723820000 |
| C | -0.8892500000 | -0.8642440000 | 0.7122710000  |
| C | -0.6230730000 | 1.2627300000  | -0.7231420000 |
| C | -1.4776330000 | 0.4039610000  | 0.1371800000  |
| H | 2.4966750000  | 1.9185150000  | 0.4683390000  |
| H | 2.5077550000  | -0.2505200000 | 1.3271590000  |
| H | 0.7726120000  | 2.8189630000  | -0.8952180000 |
| H | -1.6417300000 | -1.3228680000 | 1.3515960000  |
| H | -1.2235420000 | 1.7464260000  | -1.4861750000 |
| O | -2.6584240000 | 0.6436800000  | 0.2373770000  |
| C | 1.6553420000  | -0.9376350000 | -0.8806110000 |
| C | 0.3633220000  | -0.9596450000 | -1.3702520000 |
| H | 1.9910920000  | -1.8024690000 | -0.3177420000 |
| H | 0.1221760000  | -0.5831320000 | -2.3512380000 |
| C | -0.6470000000 | -1.7120510000 | -0.5528830000 |
| H | -1.5866920000 | -1.8538570000 | -1.0845960000 |
| H | -0.2650910000 | -2.6958040000 | -0.2661910000 |
| H | 2.4350290000  | -0.4377770000 | -1.4383350000 |
| C | 0.3929810000  | -0.6638230000 | 1.5170120000  |
| H | 0.7301270000  | -1.6516610000 | 1.8421040000  |
| H | 0.1541490000  | -0.1057650000 | 2.4258980000  |

### 3

|   |               |               |               |
|---|---------------|---------------|---------------|
| C | -1.3685030000 | 1.2317110000  | -0.8197440000 |
| C | -1.5245760000 | -0.2285780000 | -0.4850900000 |

|   |               |               |               |
|---|---------------|---------------|---------------|
| C | -0.2901520000 | 1.8771650000  | -0.3970610000 |
| C | 0.6785970000  | -1.2360860000 | -0.4637800000 |
| C | 0.6196740000  | 1.1664180000  | 0.5822730000  |
| C | 1.4095440000  | 0.0668620000  | -0.1430160000 |
| H | -2.0838840000 | 1.6975270000  | -1.4858470000 |
| H | -2.5470030000 | -0.5535160000 | -0.6635100000 |
| H | -0.0711650000 | 2.8964060000  | -0.6842530000 |
| H | 1.4102980000  | -1.9324650000 | -0.8676650000 |
| H | 1.3506350000  | 1.8503160000  | 1.0060300000  |
| O | 2.5671780000  | 0.2247800000  | -0.4364330000 |
| C | -0.3185710000 | 0.5607380000  | 1.6439660000  |
| C | -1.0750370000 | -0.5933760000 | 0.9842230000  |
| H | -0.9917820000 | 1.3415620000  | 1.9953090000  |
| H | -1.9276220000 | -0.8919380000 | 1.5902640000  |
| C | -0.0581940000 | -1.7268600000 | 0.7898540000  |
| H | 0.5843300000  | -1.8637270000 | 1.6589240000  |
| H | -0.5408830000 | -2.6800840000 | 0.5700370000  |
| H | 0.2396980000  | 0.1864350000  | 2.5029820000  |
| C | -0.5290900000 | -1.0142970000 | -1.3867860000 |
| H | -0.9295400000 | -1.9928020000 | -1.6567570000 |
| H | -0.2926480000 | -0.4781440000 | -2.3030910000 |

#### 4

|   |               |               |               |
|---|---------------|---------------|---------------|
| C | 1.1222850000  | 1.5763160000  | 0.4618510000  |
| C | 1.5366560000  | 0.1475080000  | 0.7267300000  |
| C | 0.1891010000  | 1.8048890000  | -0.4529020000 |
| C | -0.7848270000 | -1.0261380000 | 0.7380140000  |
| C | -0.5339600000 | 0.6229230000  | -1.0507640000 |
| C | -1.4526490000 | 0.1774300000  | 0.0973300000  |
| H | 1.6204680000  | 2.3865970000  | 0.9783770000  |
| H | 2.4703720000  | 0.1388580000  | 1.2881170000  |
| H | -0.1458110000 | 2.8020000000  | -0.7033670000 |
| H | -1.4899320000 | -1.5597220000 | 1.3711180000  |
| H | -1.1288940000 | 0.9042200000  | -1.9162020000 |
| O | -2.5122180000 | 0.6607690000  | 0.3808820000  |
| C | 1.7364860000  | -0.4958700000 | -0.6565640000 |
| C | 0.3591140000  | -0.6388250000 | -1.3051040000 |
| H | 2.1980660000  | -1.4814340000 | -0.5696000000 |
| H | 0.4473190000  | -0.8447950000 | -2.3692980000 |
| C | -0.3866160000 | -1.7572390000 | -0.5489600000 |
| H | -1.2752750000 | -2.0846820000 | -1.0915160000 |
| H | 0.2455250000  | -2.6266470000 | -0.3683600000 |
| H | 2.3985330000  | 0.1317510000  | -1.2518440000 |
| C | 0.4840040000  | -0.6441920000 | 1.5371830000  |
| H | 0.9380560000  | -1.5778710000 | 1.8808980000  |
| H | 0.2017480000  | -0.0752410000 | 2.4237340000  |

#### 5

|   |              |               |               |
|---|--------------|---------------|---------------|
| C | 1.7106260000 | -2.7521070000 | -0.1273850000 |
| C | 0.3774760000 | -3.0531180000 | 0.1034790000  |



|   |               |               |               |
|---|---------------|---------------|---------------|
| C | -0.5716510000 | -2.0428790000 | 0.1403710000  |
| C | -0.2009750000 | -0.7147170000 | -0.0502860000 |
| C | 1.1522770000  | -0.3969190000 | -0.2752700000 |
| C | 2.0846730000  | -1.4332080000 | -0.3220900000 |
| C | 1.5315340000  | 0.9911570000  | -0.5436820000 |
| C | -2.9571730000 | -0.2076500000 | -0.0864590000 |
| C | -3.9950140000 | 0.8311080000  | -0.3662660000 |
| C | -4.9463110000 | 1.1671950000  | 0.4897420000  |
| O | 2.8935270000  | 2.7860220000  | -0.3830300000 |
| N | 2.5495880000  | 1.6219100000  | -0.0346940000 |
| C | 3.3858440000  | 1.0533270000  | 1.0374960000  |
| S | -1.3437920000 | 0.6311360000  | 0.0314100000  |
| H | 2.4512760000  | -3.5378300000 | -0.1722440000 |
| H | 0.0681890000  | -4.0781910000 | 0.2551590000  |
| H | -1.6020050000 | -2.2988970000 | 0.3364020000  |
| H | 3.1161110000  | -1.1942020000 | -0.5455260000 |
| H | 0.9587020000  | 1.5850610000  | -1.2431240000 |
| H | -2.8987190000 | -0.9276910000 | -0.9030680000 |
| H | -3.1758850000 | -0.7291950000 | 0.8439590000  |
| H | -3.9254040000 | 1.3272200000  | -1.3279450000 |
| H | -5.0231210000 | 0.6926810000  | 1.4605280000  |
| H | -5.6786230000 | 1.9251880000  | 0.2495570000  |
| H | 2.9179180000  | 0.1876490000  | 1.4918560000  |
| H | 3.5177760000  | 1.8585240000  | 1.7528780000  |
| H | 4.3512830000  | 0.7968240000  | 0.6081980000  |

### TS3-a

|   |              |              |              |
|---|--------------|--------------|--------------|
| C | -3.187404000 | -1.184611000 | -0.555652000 |
| C | -3.526079000 | 0.042049000  | 0.000713000  |
| C | -2.532897000 | 0.935187000  | 0.365010000  |
| C | -1.186405000 | 0.604974000  | 0.215580000  |
| C | -0.839504000 | -0.652387000 | -0.300201000 |
| C | -1.853753000 | -1.516917000 | -0.714092000 |
| C | 0.561745000  | -1.070565000 | -0.475215000 |
| C | 1.082396000  | 1.859147000  | -0.830800000 |
| C | 1.763662000  | 0.604020000  | -1.299725000 |
| C | 2.988579000  | 0.197503000  | -0.800674000 |
| O | 2.628441000  | -1.466863000 | 0.202285000  |
| N | 1.390111000  | -1.316825000 | 0.535785000  |
| C | 1.162475000  | -0.977444000 | 1.930937000  |
| S | 0.030526000  | 1.797955000  | 0.685694000  |
| H | -3.958364000 | -1.877396000 | -0.862747000 |
| H | -4.564969000 | 0.313853000  | 0.128564000  |
| H | -2.790118000 | 1.910239000  | 0.755505000  |
| H | -1.579393000 | -2.473159000 | -1.141294000 |
| H | 0.803614000  | -1.637163000 | -1.362174000 |
| H | 0.452612000  | 2.265908000  | -1.618506000 |
| H | 1.804718000  | 2.628345000  | -0.556730000 |
| H | 1.516960000  | 0.319894000  | -2.314294000 |

|   |             |              |              |
|---|-------------|--------------|--------------|
| H | 3.434363000 | 0.739476000  | 0.024813000  |
| H | 3.681375000 | -0.346438000 | -1.423387000 |
| H | 0.099234000 | -0.874151000 | 2.125956000  |
| H | 1.675389000 | -0.045018000 | 2.162239000  |
| H | 1.580964000 | -1.784745000 | 2.526890000  |

### TS3-b

|   |              |              |              |
|---|--------------|--------------|--------------|
| C | -2.903604000 | -1.710522000 | 0.029326000  |
| C | -3.499645000 | -0.459337000 | 0.051119000  |
| C | -2.727767000 | 0.693509000  | -0.011932000 |
| C | -1.344737000 | 0.602544000  | -0.096334000 |
| C | -0.741450000 | -0.671663000 | -0.120819000 |
| C | -1.521454000 | -1.813493000 | -0.057288000 |
| C | 1.358841000  | 2.184499000  | -0.246845000 |
| C | 2.120881000  | 1.193110000  | 0.587584000  |
| C | 1.322956000  | 0.269486000  | 1.254904000  |
| O | 2.801063000  | -0.510246000 | -0.790346000 |
| N | 1.798648000  | -1.330145000 | -0.530914000 |
| C | 2.120417000  | -2.506058000 | 0.253696000  |
| S | -0.508823000 | 2.211507000  | -0.105603000 |
| H | -3.510570000 | -2.603803000 | 0.070590000  |
| H | -4.575508000 | -0.372090000 | 0.113979000  |
| H | -3.202809000 | 1.665896000  | 0.004421000  |
| H | -1.048306000 | -2.785220000 | -0.099819000 |
| H | 1.623641000  | 2.060328000  | -1.299265000 |
| H | 1.596644000  | 3.213938000  | 0.026539000  |
| H | 3.180874000  | 1.328056000  | 0.726719000  |
| H | 0.389006000  | 0.631313000  | 1.663331000  |
| H | 1.808592000  | -0.469959000 | 1.878865000  |
| H | 1.201574000  | -2.979520000 | 0.596367000  |
| H | 2.740919000  | -2.230730000 | 1.109196000  |
| H | 2.679817000  | -3.200705000 | -0.368436000 |
| C | 0.720554000  | -0.532008000 | -0.260658000 |
| H | 0.828299000  | 0.250973000  | -0.990188000 |

### 6

|   |               |               |               |
|---|---------------|---------------|---------------|
| C | -2.4236230000 | 2.0985790000  | -0.3436070000 |
| C | -3.3348900000 | 1.0536440000  | -0.2923780000 |
| C | -2.8967970000 | -0.2433700000 | -0.0768860000 |
| C | -1.5432340000 | -0.4987880000 | 0.1223470000  |
| C | -0.6244760000 | 0.5546860000  | 0.0907080000  |
| C | -1.0721140000 | 1.8429700000  | -0.1628990000 |
| C | 0.8189450000  | 0.2116520000  | 0.2971140000  |
| C | 0.6994620000  | -2.2669450000 | -0.0253410000 |
| C | 1.2169020000  | -0.9666080000 | -0.5905010000 |
| C | 2.7202490000  | -0.7615580000 | -0.6076040000 |

|   |               |               |               |
|---|---------------|---------------|---------------|
| O | 2.8507510000  | 0.6402770000  | -0.7607370000 |
| N | 1.7707300000  | 1.2719680000  | -0.0412750000 |
| C | 2.3458440000  | 1.8960640000  | 1.1369020000  |
| S | -1.0752440000 | -2.1762910000 | 0.4551030000  |
| H | -2.7622840000 | 3.1078300000  | -0.5317670000 |
| H | -4.3896500000 | 1.2425610000  | -0.4381190000 |
| H | -3.6012210000 | -1.0646640000 | -0.0688860000 |
| H | -0.3428530000 | 2.6388590000  | -0.2290410000 |
| H | 0.9568360000  | -0.1080620000 | 1.3435450000  |
| H | 1.2539460000  | -2.5348940000 | 0.8738410000  |
| H | 0.7883010000  | -3.0775830000 | -0.7448630000 |
| H | 0.8194500000  | -0.7961810000 | -1.5923370000 |
| H | 3.1693220000  | -1.1093400000 | 0.3319270000  |
| H | 3.2336000000  | -1.2257800000 | -1.4470160000 |
| H | 1.5335360000  | 2.3603460000  | 1.6973080000  |
| H | 3.0476720000  | 2.6658330000  | 0.8267820000  |
| H | 2.8585180000  | 1.1738030000  | 1.7846860000  |

7

|   |               |               |               |
|---|---------------|---------------|---------------|
| C | 3.1772140000  | -1.2420350000 | 0.2723930000  |
| C | 3.5060560000  | 0.0388530000  | -0.1388860000 |
| C | 2.5001210000  | 0.9633660000  | -0.3700850000 |
| C | 1.1570340000  | 0.6247700000  | -0.2133560000 |
| C | 0.8162680000  | -0.6764370000 | 0.1815060000  |
| C | 1.8424650000  | -1.5828190000 | 0.4295840000  |
| C | -0.6058130000 | -1.1465760000 | 0.3822800000  |
| C | -1.2327870000 | 1.9127450000  | 0.6600590000  |
| C | -2.0604970000 | 0.6454370000  | 0.8771520000  |
| C | -1.3118530000 | -0.4807590000 | 1.5695100000  |
| O | -2.4953460000 | 0.0669210000  | -0.3313330000 |
| N | -1.4706420000 | -0.8536650000 | -0.7814320000 |
| C | -2.2008000000 | -2.0224520000 | -1.2379380000 |
| S | -0.0070630000 | 1.8835810000  | -0.6718660000 |
| H | 3.9498820000  | -1.9732750000 | 0.4653420000  |
| H | 4.5404150000  | 0.3257150000  | -0.2696880000 |
| H | 2.7484360000  | 1.9721030000  | -0.6716560000 |
| H | 1.5828510000  | -2.5878820000 | 0.7400790000  |
| H | -0.5733040000 | -2.2270410000 | 0.5287600000  |
| H | -0.7610110000 | 2.2126550000  | 1.5963140000  |
| H | -1.8964340000 | 2.7179830000  | 0.3453820000  |
| H | -2.9625820000 | 0.9223310000  | 1.4254120000  |
| H | -2.0278030000 | -1.1708460000 | 2.0135130000  |
| H | -0.6169650000 | -0.1446870000 | 2.3351720000  |
| H | -1.4820310000 | -2.7256980000 | -1.6554360000 |
| H | -2.8871020000 | -1.7170570000 | -2.0237390000 |
| H | -2.7685260000 | -2.5058680000 | -0.4322180000 |

8

|   |               |              |              |
|---|---------------|--------------|--------------|
| C | -0.9216060000 | 1.6637580000 | 0.7826390000 |
| C | 0.3516630000  | 2.3871420000 | 0.3386580000 |

|   |               |               |               |
|---|---------------|---------------|---------------|
| C | 0.8683320000  | 1.4859870000  | -0.7762390000 |
| C | -0.6010640000 | 0.1713420000  | 0.5876200000  |
| C | 1.6468220000  | -0.7300730000 | -0.0644200000 |
| C | -1.7259260000 | -0.5647640000 | -0.1279340000 |
| N | 0.5935650000  | 0.1426280000  | -0.2638480000 |
| N | 1.3358430000  | -1.8655980000 | 0.6536710000  |
| O | 2.7688750000  | -0.5050310000 | -0.4695490000 |
| O | -2.5909390000 | -0.0711020000 | -0.7895330000 |
| O | -1.6175110000 | -1.9029310000 | 0.0309390000  |
| H | -1.7549340000 | 1.9311390000  | 0.1350750000  |
| H | -1.2051710000 | 1.8772310000  | 1.8103070000  |
| H | 0.1584500000  | 3.4056120000  | 0.0094460000  |
| H | 1.0826390000  | 2.4166290000  | 1.1473810000  |
| H | 1.9303980000  | 1.5740450000  | -0.9787280000 |
| H | 0.3100100000  | 1.6512280000  | -1.7003150000 |
| H | -0.3944040000 | -0.3409000000 | 1.5273990000  |
| H | 2.0826900000  | -2.5402350000 | 0.6337370000  |
| H | 0.4065970000  | -2.2461890000 | 0.5676560000  |
| H | -2.3148580000 | -2.3156240000 | -0.4975060000 |

#### TS4-a

|   |               |               |               |
|---|---------------|---------------|---------------|
| C | -2.1963830000 | -1.0064260000 | -0.4625790000 |
| C | -2.1687800000 | 0.1595650000  | 0.5313800000  |
| C | 0.0106280000  | -0.8229210000 | 0.5682630000  |
| C | -0.9449280000 | -1.8278640000 | -0.1056720000 |
| H | -3.1124840000 | -1.5894900000 | -0.4049320000 |
| H | -2.1115260000 | -0.6060060000 | -1.4733530000 |
| H | -2.5572580000 | -0.1334250000 | 1.5071230000  |
| H | -2.6820380000 | 1.0555050000  | 0.1944430000  |
| H | 0.3095940000  | -1.1515300000 | 1.5602540000  |
| H | -0.4692720000 | -2.2769710000 | -0.9746330000 |
| H | -1.1910820000 | -2.6242370000 | 0.5939310000  |
| N | -0.7386370000 | 0.4334010000  | 0.6403960000  |
| C | -0.1970470000 | 1.4613460000  | -0.0706450000 |
| O | -0.7341890000 | 2.4722630000  | -0.4374590000 |
| N | 1.1611640000  | 1.1177440000  | -0.3667920000 |
| H | 1.4809040000  | 1.5047240000  | -1.2484780000 |
| H | 1.9847850000  | 0.9740520000  | 0.5009070000  |
| C | 1.2904270000  | -0.4963600000 | -0.2254250000 |
| O | 1.7590900000  | -1.1337500000 | -1.1342050000 |
| O | 2.3975990000  | -0.1343610000 | 1.0357430000  |
| H | 3.2471830000  | -0.4478810000 | 0.7049560000  |

#### TS4-b

|   |             |              |              |
|---|-------------|--------------|--------------|
| C | 1.901510000 | -1.260270000 | -0.516280000 |
| C | 2.114820000 | -0.218390000 | 0.580820000  |
| C | 0.583090000 | -1.908850000 | -0.106720000 |
| H | 2.711440000 | -1.981830000 | -0.591870000 |
| H | 1.787450000 | -0.762120000 | -1.479870000 |
| H | 2.466860000 | -0.694590000 | 1.497140000  |
| H | 2.795610000 | 0.583510000  | 0.309270000  |

|   |              |              |              |
|---|--------------|--------------|--------------|
| H | 0.013340000  | -2.322630000 | -0.933340000 |
| H | 0.742140000  | -2.688680000 | 0.638910000  |
| C | 0.380410000  | 1.457140000  | -0.276360000 |
| O | 1.146870000  | 2.399550000  | -0.354420000 |
| H | -2.529920000 | 1.191660000  | 0.173080000  |
| C | -1.383190000 | -0.517320000 | -0.045500000 |
| O | -2.076320000 | -1.162430000 | -0.770390000 |
| C | 0.709420000  | 0.341710000  | 0.767510000  |
| H | 0.576530000  | 0.757430000  | 1.770020000  |
| N | -0.181400000 | -0.806140000 | 0.525730000  |
| N | -2.206930000 | 0.496760000  | 0.847820000  |
| H | -2.980980000 | -0.007840000 | 1.275770000  |
| H | -1.640630000 | 0.967300000  | 1.550500000  |
| O | -0.703040000 | 1.232790000  | -0.905840000 |

## 9

|   |               |               |               |
|---|---------------|---------------|---------------|
| C | -0.9528880000 | -1.5093980000 | -0.5073610000 |
| C | -2.2803030000 | -0.8155170000 | -0.1785950000 |
| C | -1.8831810000 | 0.6362210000  | 0.1477730000  |
| C | -0.0104430000 | -0.8570030000 | 0.5059070000  |
| C | 0.4619360000  | 1.3717910000  | 0.0271430000  |
| C | 1.4437620000  | -0.7259160000 | 0.0881940000  |
| N | -0.4796060000 | 0.5248710000  | 0.5658330000  |
| N | 1.6363220000  | 0.6199660000  | -0.1252740000 |
| O | 0.3202960000  | 2.5227060000  | -0.2865920000 |
| O | 2.2532820000  | -1.6031120000 | -0.0345050000 |
| H | -0.6282440000 | -1.2557220000 | -1.5185970000 |
| H | -0.9879720000 | -2.5914320000 | -0.4170310000 |
| H | -2.9998610000 | -0.8694280000 | -0.9918340000 |
| H | -2.7299040000 | -1.2834830000 | 0.6976530000  |
| H | -2.4956180000 | 1.0644970000  | 0.9379100000  |
| H | -1.9417240000 | 1.2931770000  | -0.7204580000 |
| H | -0.0652830000 | -1.3522470000 | 1.4767920000  |
| H | 2.4896810000  | 1.0229570000  | -0.4779400000 |

## 10

|   |               |               |               |
|---|---------------|---------------|---------------|
| C | -0.9761990000 | -1.4890580000 | -0.5190530000 |
| C | -2.2890330000 | -0.7719880000 | -0.1777160000 |
| C | -1.8666680000 | 0.6666030000  | 0.1796030000  |
| C | -0.0201250000 | -0.8617960000 | 0.5001530000  |
| C | 0.4922200000  | 1.3382740000  | 0.0140150000  |
| C | 1.4255350000  | -0.7214450000 | 0.0850400000  |
| N | -0.4563000000 | 0.5226060000  | 0.5697420000  |
| O | 0.3981360000  | 2.4770590000  | -0.3126930000 |
| O | 2.2524630000  | -1.5614050000 | -0.0329060000 |
| O | 1.6616880000  | 0.6048740000  | -0.1542090000 |
| H | -0.6498530000 | -1.2339270000 | -1.5289280000 |
| H | -1.0332960000 | -2.5705610000 | -0.4362290000 |
| H | -3.0057320000 | -0.7950490000 | -0.9946350000 |

|   |               |               |               |
|---|---------------|---------------|---------------|
| H | -2.7515570000 | -1.2481510000 | 0.6870150000  |
| H | -2.4563910000 | 1.0805360000  | 0.9936780000  |
| H | -1.9271740000 | 1.3487030000  | -0.6680500000 |
| H | -0.0745740000 | -1.3675550000 | 1.4651680000  |

### **H<sub>2</sub>O**

|   |              |               |               |
|---|--------------|---------------|---------------|
| H | 0.0000000000 | -0.7599420000 | -0.4678220000 |
| H | 0.0000000000 | 0.7599420000  | -0.4678220000 |
| O | 0.0000000000 | 0.0000000000  | 0.1169560000  |

### **NH<sub>3</sub>**

|   |               |               |               |
|---|---------------|---------------|---------------|
| N | 0.0000000000  | 0.1150260000  | 0.0000000000  |
| H | -0.4685760000 | -0.2683680000 | 0.8116150000  |
| H | -0.4685760000 | -0.2683680000 | -0.8116150000 |
| H | 0.9371510000  | -0.2684470000 | 0.0000000000  |
